1 **Title:** Evolutionary history and classification of Micropia retroelements in  
2 Drosophilidae species

3

4 **Short title:** Micropia retrotransposable element in Drosophilidae

5

6 Juliana Cordeiro<sup>1#†\*</sup> ([orcid.org/0000-0003-0902-9638](https://orcid.org/0000-0003-0902-9638)), Tuane L. Carvalho<sup>2†</sup>, Vera L. da

7 S. Valente<sup>3</sup>, Lizandra J. Robe<sup>2, 4</sup> ([orcid.org/0000-0001-8506-9143](https://orcid.org/0000-0001-8506-9143))

8

9 <sup>1</sup>Departamento de Ecologia, Zoologia e Genética, Instituto de Biologia, Universidade  
10 Federal de Pelotas, Pelotas, RS, Brazil

11 <sup>2</sup>Programa de Pós-Graduação em Biodiversidade Animal, Departamento de Biologia  
12 Universidade Federal de Santa Maria, Santa Maria, RS, Brazil

13 <sup>3</sup>Departamento de Genética, Instituto de Biociências, Universidade Federal do Rio  
14 Grande do Sul, Porto Alegre; Rio Grande do Sul; Brazil

15 <sup>4</sup>Departamento de Biologia, Centro de Ciências Naturais e Exatas, Universidade Federal  
16 de Santa Maria, Santa Maria, RS, Brazil

17 <sup>#</sup>Current location: Department of Genetics, University of Wisconsin – Madison, USA.

18

19 \* Corresponding author

20 E-mail: [jlncdr@gmail.com](mailto:jlncdr@gmail.com)

21

22 † These authors contributed equally to the manuscript

23

## 24 **Abstract**

25 Current knowledge indicates TEs have been shaping the evolution of genomes and host  
26 species, contributing to the creation of new genes and promoting rearrangements  
27 frequently associated with new regulatory networks. Support for these hypothesis  
28 frequently result from studies with model species, and *Drosophila* detaches as a great  
29 model organism to the study of TEs. Micropia belongs to the Ty3/Gypsy group of LTR  
30 retroelements, and comprises one of the least studied *Drosophila* transposable elements.  
31 In this study, we assessed the evolutionary history of Micropia within Drosophilidae,  
32 while trying to assist in the classification of this TE. At first, we analyzed its presence in  
33 the genome of several species from natural populations and then, based on searches  
34 within genomic databases, we retrieved Micropia-like sequences from distinct  
35 Drosophilidae species genomes. We expanded the knowledge of Micropia distribution  
36 within *Drosophila*, and detected an array of divergent sequences, which allowed  
37 subdividing this retroelement in 20 subfamilies. Even so, a patchy distribution of  
38 Micropia sequences within the Drosophilidae phylogeny could be identified combined  
39 with incongruences of the species and the Micropia phylogenies. Comparing dS values  
40 between Micropia and host nuclear sequences, we found several cases of unexpected  
41 high levels of similarity between Micropia sequences found in divergent species. All  
42 these findings propose a hypothesis to the evolution of Micropia within Drosophilidae,  
43 including several VTTs and HTTs events, associated to ancestral polymorphisms and  
44 recurrent Micropia sequences diversification.

45

46 **Key words:** transposable elements diversification; LTR retrotransposon subfamilies;  
47 *cardini* group; *repleta* group; *melanogaster* group; horizontal transposon transfer;  
48 vertical transposon transfer

## 49 **Introduction**

50           Since Barbara McClintock publication of maize genes moving around the  
51 genome, transposable elements (TEs) went from junk to pivotal characters in the control  
52 and evolution of genomes. The discovery of unexpected high amounts of TEs in the  
53 genome of distinct species has pointed out toward functions of TEs on these genomes  
54 [1, 2, 3]. In fact, current knowledge indicates TEs have been shaping the evolution of  
55 genomes and host species [4], contributing to the creation of new genes [5, 6] and  
56 promoting rearrangements frequently associated with new regulatory networks [7, 8 9].  
57 More than this, there is even evidence that TEs may assist in the control of embryonic  
58 development [9, 10] and genomic plasticity [11].

59           A large fraction of the genomes of most eukaryotes is composed by TEs known  
60 as retroelements [12, 13, 14], some of which belong to the LTR order. Phylogenetic  
61 analyses of such retroelements reveal an evolutionary history consisting mainly of  
62 vertical transmissions and intraspecific diversification [15]. However, autonomous TEs  
63 are able to invade naïve genomes through horizontal transposon transfers (HTT), in  
64 which they make copies of themselves and evade host defense systems before becoming  
65 fully silenced by genomic anti-TE mechanisms [16, 17]. Although HTTs are still  
66 considered rare events, mainly because we can only detect the successful ones, it seems  
67 that such events represent an important step in the TEs' life cycle, enabling them to  
68 evade the natural progression of their birth-and-death process that can culminate in their  
69 extinction [18, 19, 17, 16]. After the HTT event, TEs can have a wide range of positive  
70 and/or negative consequences in the host genome [20]; but mainly, they become a new  
71 set of sequences where evolution can take place, unveiling their relevance to host genome  
72 evolution [21, 22].

73           A growing number of studies have identified HTTs using distinct analysis  
74 strategies [15, 16, 23, 24, 25]. For instance, a patchy taxonomic distribution among  
75 monophyletic species is expected if TEs are moving horizontally rather than being  
76 vertically inherited. This patchy distribution associated with incongruences between  
77 species and TEs phylogenies and an unexpected high nucleotide identity between TEs  
78 found in the genome of divergent species widely strengthens the evidence for HTT [26,  
79 17, 25, 27, 28]. According to these criteria, LTR retrotransposons account for  
80 approximately 20% of HTT events across the insect's genomes [16]. This value  
81 increases when only *Drosophila* genomes are analyzed, e.g. LTR retroelements account  
82 for 90% of the HTT events detected across the genomes of *D. melanogaster*, *D.*  
83 *simulans* and *D. yakuba* [29].

84           Micropia is a retrotransposon that belongs to the Ty3/Gypsy group of LTR  
85 retroelements [30], which is closely related to retroviruses [31, 32]. Micropia was first  
86 discovered in the lampbrush loops of the *Drosophila hydei* Y chromosomes. Until  
87 recently, there were only four best-characterized Micropia elements, and these were  
88 found in the genomes of *D. hydei* (named dhMiF2 and dhMiF8) and *D. melanogaster*  
89 (named Dm11 and Dm2) [33, 34, 35]. Recently, complete and probably active Micropia  
90 reference sequences were found in the genomes of *D. simulans* and *D. sechellia* [15].  
91 Nevertheless, Micropia related sequences are also present in the genomes of several  
92 *Drosophila* and *Zaprionus* species, showing an irregular pattern of distribution [36, 37,  
93 38, 39, 40, 41]. In some species (like *D. hydei*), Micropia shows an effective  
94 transcription based repression mechanism associated with antisense RNAs [37, 41, 42].  
95 On the other hand, the genomes of other species (like *D. melanogaster*) seem to be  
96 absent from autonomous Micropia sequences [41].

97           Here, our goals were to understand the most likely evolutionary history of  
98    Micropia retroelement sequences within Drosophilidae, while trying to assist in the  
99    classification of this TE. At first, we analyzed its presence in the genome of several  
100   species from natural populations and sequenced the detected elements. Then, based on  
101   searches within genomic databases, we identified and isolated Micropia-like sequences  
102   in the genomes of different species. All these sequences were used to propose a  
103   hypothesis to the evolution of Micropia within Drosophilidae, while assessing its  
104   subdivision and identifying several cases of HTTs.

105

## 106    **Materials and Methods**

### 107    **Species analyzed**

108    For this study, we analyzed the presence/absence of Micropia sequences in the genomes  
109    of natural populations of 24 *Drosophila* species using PCR-blot and Dot-blot searches  
110    (hereafter “*in vitro searches*”) following the methodology described at *In vitro*  
111    *searches: DNA manipulation, PCR-blot, Dot-blot and sequencing* (see below) (Table 1).  
112    In vitro searches were also previously performed for other three species of the *cardini*  
113    group [39], and for *D. melanogaster* [34, 35] and *D. hydei* [33]; the sequences thus  
114    obtained were downloaded from GenBank. We also analyzed the presence/absence of  
115    Micropia sequences in the genome of 26 species with available genomes at NCBI  
116    ([blast.ncbi.nlm.nih.gov/Blast.cgi](http://blast.ncbi.nlm.nih.gov/Blast.cgi)) and Flybase ([flybase.org/blast/](http://flybase.org/blast/)) websites (hereafter  
117    “*in silico searches*”) plus two species, *D. suzukii* and *D. buzzatii*, whose genomes are  
118    available at personal websites (<http://spottedwingflybase.org/> and  
119    <https://dbuz.uab.cat/welcome.php>, respectively), following the criteria described in *In*  
120    *silico searches: Genomic analysis* (see below) (Table 1). Thus, *D. buzzatii*, and *D.*  
121    *melanogaster* were the only species for which both search strategies were applied. The

122 classification scheme adopted for each of these species across this study follows the

123 proposal of [43].

124

125 **Table 1. Presence/absence of Micropia sequences in the genomes of Drosophilidae species. Methodology employed, number of sequences**  
 126 **and GeneBank accession numbers are also shown. \* Sequences used as initial BLASTn queries.**

| Genus             | Subgenus          | Group species    | Species                    | Presence/absence | Methodology | GenBank acc. nos.                                                   |
|-------------------|-------------------|------------------|----------------------------|------------------|-------------|---------------------------------------------------------------------|
| <i>Drosophila</i> | <i>Dorsilopha</i> | <i>busckii</i>   | <i>D. busckii</i>          | +                | in silico   | see Table S2                                                        |
| <i>Drosophila</i> | <i>Drosophila</i> | <i>cardini</i>   | <i>D. acutilabella</i>     | +                | in vitro    | FJ748684*, FJ748685*, FJ748686*,<br>FJ748687*, FJ748688*            |
|                   |                   |                  | <i>D. arawakana</i>        | -                | in vitro    | -                                                                   |
|                   |                   |                  | <i>D. cardini</i>          | +                | in vitro    | FJ748690*, FJ748691*, FJ748692*                                     |
|                   |                   |                  | <i>D. cardinoides</i>      | +                | in vitro    | EF090263*, EU149929*, EU149930*                                     |
|                   |                   |                  | <i>D. dunni</i>            | -                | in vitro    | -                                                                   |
|                   |                   |                  | <i>D. neocardini</i>       | +                | in vitro    | EF090264*, EU149931*, EU149932*,<br>EU149933*                       |
|                   |                   |                  | <i>D. neomorpha</i>        | +                | in vitro    | FJ748695*, FJ748696*, FJ748697*                                     |
|                   |                   |                  | <i>D. nigrodunni</i>       | -                | in vitro    | -                                                                   |
|                   |                   |                  | <i>D. parthenogenetica</i> | +                | in vitro    | FJ748698*, FJ748699*, GQ339587*,<br>GQ339588*, GQ339589*, GQ339590* |
|                   |                   |                  | <i>D. polymorpha</i>       | +                | in vitro    | EF090265*, EF149934*, EF149935*,<br>EF149936*, EF149937*            |
|                   |                   |                  | <i>D. procardinoides</i>   | +                | in vitro    | FJ748700*, FJ748701*, FJ748702*                                     |
|                   |                   |                  | <i>D. similis</i>          | -                | in vitro    | -                                                                   |
|                   |                   | <i>funnebris</i> | <i>D. funnebris</i>        | -                | in vitro    | -                                                                   |
|                   |                   | <i>guaramunu</i> | <i>D. griseolineata</i>    | -                | in vitro    | -                                                                   |
|                   |                   |                  | <i>D. maculifrons</i>      | -                | in vitro    | -                                                                   |
|                   |                   | <i>guarani</i>   | <i>D. guaru</i>            | -                | in vitro    | -                                                                   |
|                   |                   |                  | <i>D. ornatifrons</i>      | -                | in vitro    | -                                                                   |
|                   |                   | <i>immigrans</i> | <i>D. albomicans</i>       | +                | in silico   | see Table S2                                                        |
|                   |                   |                  | <i>D. immigrans</i>        | -                | in vitro    | -                                                                   |

|                        |                     |                            |                       |                        |                                                                    |              |
|------------------------|---------------------|----------------------------|-----------------------|------------------------|--------------------------------------------------------------------|--------------|
| <i>Siphlodora</i>      | <i>tripunctata</i>  | <i>D. bandeirantorum</i>   | -                     | in vitro               | -                                                                  |              |
|                        |                     | <i>D. mediodiffusa</i>     | -                     | in vitro               | -                                                                  |              |
|                        |                     | <i>D. mediopictoides</i>   | -                     | in vitro               | -                                                                  |              |
|                        |                     | <i>D. mediopunctata</i>    | -                     | in vitro               | -                                                                  |              |
|                        |                     | <i>D. paraguayensis</i>    | -                     | in vitro               | -                                                                  |              |
|                        |                     | <i>D. paramediostriata</i> | -                     | in vitro               | -                                                                  |              |
|                        |                     | <i>D. tripunctata</i>      | -                     | in vitro               | -                                                                  |              |
|                        | <i>repleta</i>      | <i>D. arizonae</i>         | +                     | in silico              | see Table S2                                                       |              |
|                        |                     | <i>D. buzzatii</i>         | +                     | in vitro/<br>in silico | FJ748689*, GQ339579*, GQ339580*,<br>GQ339582*, see Table S2        |              |
|                        |                     | <i>D. hydei</i>            | +                     | in vitro               | X13304*, X13305*                                                   |              |
|                        |                     | <i>D. mercatorum</i>       | +                     | in vitro               | FJ748693*, FJ748694*, GQ339583*,<br>GQ339584*, GQ339585* GQ339586* |              |
|                        |                     | <i>D. mojavensis</i>       | +                     | in silico              | see Table S2                                                       |              |
|                        |                     | <i>D. navojoa</i>          | +                     | in silico              | see Table S2                                                       |              |
| <i>virilis</i>         | <i>D. zottii</i>    | +                          | in vitro              | FJ748703*, GQ339578*   |                                                                    |              |
|                        | <i>D. americana</i> | +                          | in silico             | see Table S2           |                                                                    |              |
|                        | <i>D. virilis</i>   | +                          | in silico             | see Table S2           |                                                                    |              |
|                        | <i>Sophophora</i>   | <i>melanogaster</i>        | <i>D. ananassae</i>   | +                      | in silico                                                          | see Table S2 |
|                        |                     |                            | <i>D. bipectinata</i> | +                      | in silico                                                          | see Table S2 |
| <i>D. elegans</i>      |                     |                            | +                     | in silico              | see Table S2                                                       |              |
| <i>D. erecta</i>       |                     |                            | +                     | in silico              | see Table S2                                                       |              |
| <i>D. ficusphila</i>   |                     |                            | +                     | in silico              | see Table S2                                                       |              |
| <i>D. kikkawai</i>     |                     |                            | +                     | in silico              | see Table S2                                                       |              |
| <i>D. melanogaster</i> |                     |                            | +                     | in vitro/in silico     | X14037*, X14173*, see Table S2                                     |              |
| <i>D. rhopaloo</i>     |                     |                            | +                     | in silico              | see Table S2                                                       |              |
| <i>D. sechellia</i>    |                     |                            | +                     | in silico              | see Table S2                                                       |              |
| <i>D. simulans</i>     |                     |                            | +                     | in silico              | see Table S2                                                       |              |



|                         |                            |                   |                        |   |           |              |
|-------------------------|----------------------------|-------------------|------------------------|---|-----------|--------------|
|                         |                            |                   | <i>D. suzukii</i>      | + | in silico | see Table S2 |
|                         |                            |                   | <i>D. takahashii</i>   | + | in silico | see Table S2 |
|                         |                            |                   | <i>D. yakuba</i>       | + | in silico | see Table S2 |
|                         |                            | <i>obscura</i>    | <i>D. miranda</i>      | - | in silico | -            |
|                         |                            |                   | <i>D. persimilis</i>   | - | in silico | -            |
|                         |                            |                   | <i>D. subobscura</i>   | - | in silico | -            |
|                         |                            | <i>willistoni</i> | <i>D. willistoni</i>   | + | in silico | see Table S2 |
|                         | <i>Hawaiian Drosophila</i> | -                 | <i>D. grimshawi</i>    | - | in silico | -            |
| <i>Phortica</i>         | -                          | <i>variegata</i>  | <i>P. variegata</i>    | - | in silico | -            |
| <i>Scaptodrosophila</i> | -                          | -                 | <i>S. lebanonensis</i> | + | in silico | see Table S2 |

---

127

128

129

130

131 ***In vitro* searches: DNA manipulation, PCR-blot, Dot-blot and sequencing**

132 Genomic DNA was prepared according to [44]. PCR reactions were performed  
133 using Micropia primers to amplify the reverse transcriptase (RT) domain within the pol  
134 gene, as described in [39]. The following conditions were used for 25 µl PCR reactions:  
135 25 ng of template DNA, 20 pMol of each primer, 0.2 mM of each nucleotide, 1.5 mM  
136 MgCl<sub>2</sub> and 1 unit Taq DNA polymerase in 1x polymerase buffer (all from Invitrogen).  
137 Amplifications parameters were 95°C for 2 min, 35 cycles at 95°C for 30 s, 50-60°C for  
138 30 s and 72°C for 1 min, followed by an extension step at 72°C for 10 min. *Drosophila*  
139 *hydei* genomic DNA was used as a positive control.

140 In order to confirm the homology of the amplified fragments, a PCR-blot was  
141 prepared with the obtained PCR amplicons. The PCR products were separated by  
142 electrophoresis using a 1% agarose gel and transferred to nylon membranes (Hybond  
143 N+®, GE Healthcare), where hybridization was carried out using an 812 bp fragment of  
144 Micropia from *D. hydei* as probe. This fragment ranges from nucleotide 1,777 to 2,589  
145 of the *D. hydei* dhMiF2 sequence (GenBank acc. no. X133041), covering part of the RT  
146 sequence. The probe label and signal detection were performed using the Gene  
147 Images™ AlkPhos Direct™ labelling and detection system (GE Healthcare),  
148 according to manufacturer's instructions. The membranes were hybridized at 55°C and  
149 exposed for 5 min.

150 A Dot-blot procedure was also performed using genomic DNA. Denaturation  
151 was performed using 3 µg of genomic DNA in a final volume of 10 µl, which was  
152 directly applied onto a nylon membrane (Hybond N+®, GE Healthcare). As positive  
153 control, 5 ng (in 10 µl) of the dhMiF2 probe was used. The probe labeling, signal  
154 detection, and hybridization temperature were performed as above. Dot-blot revealing  
155 film underwent 3 min exposure.

156 For sequencing, PCR amplicons from each species presenting positive signals  
157 for Micropia were separated by 1.5% agarose gel electrophoresis and purified using  
158 Illustra GFX™ PCR DNA and Gel Band Purification kit (GE Healthcare) according to  
159 the supplier's specifications. The fragments were cloned using pGEM®-T Easy Vector  
160 system (Promega). The obtained recombinant plasmids underwent a new PCR reaction  
161 using the universal M13 primers at a 55°C annealing temperature. The amplicons were  
162 purified using ExoI-SAP (GE Healthcare) and directly sequenced in a  
163 MegaBACETM500 (GE Healthcare). Forward and reverse strands were sequenced;  
164 ambiguities and compressions were resolved through assemblage in the Staden Package  
165 Gap4 program [45]. GenBank accession numbers are indicated in Table 1.

166

#### 167 ***In silico* searches: genomic analysis**

168 BLAST searches were performed in *Drosophila* genomes available at NCBI  
169 ([blast.ncbi.nlm.nih.gov/Blast.cgi](http://blast.ncbi.nlm.nih.gov/Blast.cgi)) and Flybase website ([flybase.org/blast/](http://flybase.org/blast/)), using default  
170 parameters. For *D. buzzatii* and *D. suzukii*, searches were performed, respectively, in the  
171 ‘*Drosophila buzzatii* Genome Project’ website ([dbuz.uab.cat/welcome.php](http://dbuz.uab.cat/welcome.php)) and in the  
172 ‘Spotted Wing FlyBase’ website ([spottedwingflybase.org/](http://spottedwingflybase.org/)). The searches were finished  
173 in January 2018.

174 The initial BLASTn queries consisted of Micropia reverse transcriptase (RT)  
175 nucleotide sequences obtained by [39, 33, 34 and 35] retrieved from GeneBank (Table  
176 1). The retrieved sequences obtained during the *in silico* searches showing scores higher  
177 than 50 were downloaded, including 2 kb from both sides of each hit. After that, each  
178 retrieved sequence was aligned with the set of query sequences using ClustalW, as  
179 implemented in MEGA6 software [46]. Sequences that failed to align in this multiple  
180 alignment step were further submitted to pairwise or even local alignment against the

181 query sequence presenting the highest score in the BLASTn searches (hereafter “best  
182 query”). In this case, fragments presenting less than 300 bp of confirmed homology to  
183 its best query sequence were withdrawn from the alignment. Furthermore, after  
184 compressing the analyzed region, identical nucleotide sequences recorded for the same  
185 species were joined in a single sequence.

186 A codon-based alignment was then performed using Muscle [47] as  
187 implemented in MEGA6 software. Gaps presented in this matrix were further resolved,  
188 in order to leave all sequences in frame, to obtain the aligned amino acid matrix. All  
189 these translated sequences were then used as queries to perform exhaustive tBLASTn  
190 searches, with the same strategy described above. The final matrix encompassed all  
191 sequences obtained under these criteria that presented a minimum overlap of 300bp to  
192 the previous nucleotide alignment, after a final codon-based alignment performed in  
193 Muscle.

194 After completing the matrix, putative functional RT Micropia sequences were  
195 identified by translating each unaligned nucleotide sequence in the different reading  
196 frames. Once an Open Reading Frame (ORF) was detected, BLASTn searches further  
197 confirmed its identity.

198

### 199 **Phylogenetic analysis and Micropia subfamilies**

200 Phylogenetic analyses were performed using the amino acid alignment obtained  
201 after resolving all gaps and leaving all nucleotide sequences in frame. Fifty amino acid  
202 sequences belonging to each of the five main clades recently established by [15] for the  
203 Micropia/Sacco group within Ty3/Gypsy were selected from the alignment provided by  
204 the authors. These sequences were included as a “taxonomic framework” to guide  
205 conclusions related to new Micropia sequences in our phylogenetic analyses, in which a

206 Copia-like transposable element sequence from *D. melanogaster* (GenBank access  
207 number X01472) was used as outgroup.

208 Bayesian phylogenetic analysis (BA) was performed under a mixed model with  
209 gamma correction, as implemented in MrBayes3.1.2 software, through Cipres  
210 Computational Resources [48]. This Markov Chain Monte Carlo (MCMC) search was  
211 run for 10,000,000 generations, with trees saved every 1,000 after a burn-in of 2,500.  
212 The Posterior Probability (PP) of each clade on the 50% majority rule consensus tree  
213 was calculated and the resulting tree was visualized in FigTree. The tree so obtained  
214 was used to detect intraspecific sequences sharing a most recent common ancestor  
215 (MRCA). In these cases, only the sequence with the shortest branch (the most similar to  
216 the inferred MRCA sequence) was maintained as representative of that clade in a new  
217 round of BA analysis. The final tree was compared to the species tree, as compiled from  
218 [49, 50, 51, 52, 53, 54 and 55] data. Subfamilies of the Micropia TE sequences were  
219 identified using the criterion established by [30], according to which reciprocally  
220 monophyletic sequences with less than 30% of divergence at the amino acid level could  
221 be grouped in the same TE subfamily. This analysis was performed in MEGA6, using  
222 Poisson amino acid substitution model.

223

#### 224 **dS and divergence time estimates**

225 Pairwise synonymous distance (dS) values were estimated for Micropia in-frame  
226 nucleotide sequences and for three host nuclear genes sequences using Nei and Gojobori  
227 (1986) method, as implemented in MEGA6. Alcohol-dehydrogenase (*Adh*), alpha-  
228 metildopa (*Amd*) and dopa-decarboxylase (*Ddc*) sequences were downloaded from  
229 GeneBank or retrieved from the species genomes using BLASTn searches (for  
230 GenBank or scaffold accession numbers, see S1 Table). In order to identify if the

231 Micropia dS values were significantly lower than those observed for the host nuclear  
232 genes, accounting for differences in the number of synonymous sites, a one-tailed  
233 Fisher's exact test was performed using R v.3.5.2 [57]. Divergence times were also  
234 eventually evaluated using dS estimates and a synonymous substitution rate of 0.016  
235 substitutions per site per million years, as calculated for *Drosophila* genes with low  
236 codon usage bias [58].

237

## 238 **Results**

### 239 **Species analyzed**

240 A total of 56 Drosophilidae species were analyzed for the presence/absence of  
241 Micropia sequences (Table 1). Thirty species were analyzed by in vitro searches and 28  
242 species were analyzed through *in silico* searches.

243

### 244 **Patchy distribution of Micropia sequences in the Drosophilidae species genomes**

245 The applied methodologies were able to identify the presence of distinct  
246 Micropia related sequences in the genome of 34 *Drosophila* species (Table 1 and S2  
247 Table). *In vitro* signals of Micropia copies were encountered in *D. melanogaster* and in  
248 some species from *cardini* (8 of the 12 species tested) and *repleta* (4 of the 4 species  
249 tested) groups, despite the fact that 13 other species were also tested (Table 1, S1 Fig,  
250 and data not shown). Conversely, *in silico* searches enabled the isolation of Micropia  
251 sequences in the genomes of *D. busckii*, *D. albomicans*, *D. willistoni* and *S.*  
252 *lebanonensis*, and in species from the *repleta* (4 of the 4 species tested), *virilis* (2 of the  
253 2 species tested) and *melanogaster* (12 of the 12 species tested) groups. None Micropia  
254 sequence could be found for *D. grimshawi* (picture wing group), *D. funebris*, *D.*  
255 *immigrans* or for any species of the *guaramunu*, *guarani*, *obscura*, and *tripunctata*

256 groups. So, interestingly intra-group polymorphisms in the status of presence/absence of  
257 Micropia sequences were solely identified for the *cardini* and *immigrans* groups. Fig 1  
258 shows the species tree informing the presence and absence of Micropia related  
259 sequences in the genomes of each of these species.

260

261 **Fig 1. Phylogenetic reconstruction of species analyzed in this study.** Phylogenetic  
262 reconstruction was based on data compiled from [49, 50, 51, 52, 53, 54 and 55]. Species  
263 name in black represent presence of Micropia sequences and species name in grey  
264 represent absence of such sequences. Distinct branch colours represent distinct  
265 subgenera within the *Drosophila* genus, and the classification follows [43]. *Drosophila*  
266 genus group species are also indicated to the right. *Scaptodrosophila* and *Phortica* are  
267 represented as outgroups of the *Drosophila* genus. Dashed line represents the potential  
268 phylogenetic position of *D. zottii*, since there is no molecular phylogeny neither any  
269 nuclear or mitochondrial gene available for this species.

270

### 271 **Phylogenetic analysis, Micropia diversity, and potential coding sequences**

272 As several intraspecific sequences clustered together in the BA phylogenetic tree  
273 obtained for the whole set of Micropia sequences (S2 Fig and S1 File), the alignment  
274 could be reduced from 298 to 149 sequences (S2 File). The final Micropia phylogenetic  
275 tree reinforced reciprocal monophyly of several sets of sequences and confirmed the  
276 identity of the retrieved sequences, which were clustered with Micropia sequences  
277 obtained by [15] (Fig 2). Further evaluation of the recovered tree topology reveals the  
278 presence of four main clusters, which are listed here in ascending order of divergence:  
279 the first, presenting the Sacco sequences obtained by [15]; the second, grouping  
280 representatives of the Blastopia and MDG3 sequences obtained by [15]; the third,

281 presenting the Bicca element recovered by [15]; and the fourth recovering all the  
282 Micropia sequences in a major polytomic clade, including sequences obtained by [15].

283

284 **Fig 2. Bayesian phylogenetic tree of the Drosophilidae Micropia sequences**

285 **analyzed in this study.** The phylogenetic tree was based on amino acid sequences

286 following a mixed evolution model with gamma correction. Bargues and Lerat's

287 sequences [15] were included in the analysis. Numbers from 1 to 20 on the left

288 represent the Micropia subfamilies recovered in our data. Filled circles after Micropia

289 sequence names indicate sequences involved in possible HTT events based on one-

290 tailed Fisher's exact test involving pairwise comparisons of dS values between Micropia

291 and nuclear genes (*Adh* in orange, *Amd* in pink, *Ddc* in purple; see S4 Table). Stars

292 represent the four best-characterized Micropia elements (*D. hydei* dhMiF2 and dhMiF8;

293 and *D. melanogaster* Dm11 and Dm2). The posterior probability of each clade is

294 indicated beside its respective internal branch.

295

296 Following Capy's et al. [30] criteria, we were able to recover 20 potential

297 Micropia subfamilies based on monophyletic sequences (Fig 2) showing amino acid

298 genetic divergence lower than 0.3 (Table 2 and S3 Table). Of these, nine subfamilies are

299 monotypic and represented by a single sequence (subfamilies 2, 6, 8, 13, 16, 17, 18, 19

300 and 20). To the exception of subfamilies 4 and 15 (which were encountered only in

301 species of the *melanogaster* group), all the remaining Micropia subfamilies are

302 composed by species of distinct *Drosophila* species groups and subgenera.



303 **Table 2. Pairwise amino acid genetic distances between Micropia subfamilies.**

|          | 01    | 02    | 03    | 04    | 05    | 06    | 07    | 08    | 09    | 10    | 11    | 12    | 13    | 14    | 15    | 16    | 17    | 18    | 19    |
|----------|-------|-------|-------|-------|-------|-------|-------|-------|-------|-------|-------|-------|-------|-------|-------|-------|-------|-------|-------|
| Subf. 02 | 0.357 |       |       |       |       |       |       |       |       |       |       |       |       |       |       |       |       |       |       |
| Subf. 03 | 0.313 | 0.345 |       |       |       |       |       |       |       |       |       |       |       |       |       |       |       |       |       |
| Subf. 04 | 0.327 | 0.343 | 0.297 |       |       |       |       |       |       |       |       |       |       |       |       |       |       |       |       |
| Subf. 05 | 0.385 | 0.407 | 0.338 | 0.335 |       |       |       |       |       |       |       |       |       |       |       |       |       |       |       |
| Subf. 06 | 0.436 | 0.397 | 0.412 | 0.423 | 0.315 |       |       |       |       |       |       |       |       |       |       |       |       |       |       |
| Subf. 07 | 0.410 | 0.442 | 0.324 | 0.341 | 0.376 | 0.376 |       |       |       |       |       |       |       |       |       |       |       |       |       |
| Subf. 08 | 0.690 | 0.739 | 0.533 | 0.620 | 0.625 | 0.496 | 0.302 |       |       |       |       |       |       |       |       |       |       |       |       |
| Subf. 09 | 0.407 | 0.521 | 0.328 | 0.360 | 0.368 | 0.351 | 0.181 | 0.433 |       |       |       |       |       |       |       |       |       |       |       |
| Subf. 10 | 0.421 | 0.407 | 0.341 | 0.345 | 0.381 | 0.400 | 0.217 | 0.451 | 0.237 |       |       |       |       |       |       |       |       |       |       |
| Subf. 11 | 0.468 | 0.461 | 0.431 | 0.405 | 0.454 | 0.422 | 0.274 | 0.512 | 0.284 | 0.271 |       |       |       |       |       |       |       |       |       |
| Subf. 12 | 0.435 | 0.425 | 0.360 | 0.368 | 0.480 | 0.441 | 0.366 | 0.635 | 0.384 | 0.361 | 0.426 |       |       |       |       |       |       |       |       |
| Subf. 13 | 0.664 | 0.401 | 0.580 | 0.574 | 0.549 | 0.751 | 0.518 | 0.586 | 0.584 | 0.535 | 0.573 | 0.437 |       |       |       |       |       |       |       |
| Subf. 14 | 0.413 | 0.441 | 0.358 | 0.382 | 0.393 | 0.374 | 0.332 | 0.577 | 0.334 | 0.317 | 0.385 | 0.354 | 0.539 |       |       |       |       |       |       |
| Subf. 15 | 0.381 | 0.512 | 0.346 | 0.363 | 0.398 | 0.406 | 0.323 | 0.586 | 0.318 | 0.324 | 0.385 | 0.302 | 0.440 | 0.304 |       |       |       |       |       |
| Subf. 16 | 1.499 | 0.857 | 1.345 | 1.425 | 1.338 | 1.460 | 1.437 | 1.368 | 1.401 | 1.359 | 1.302 | 1.484 | 1.408 | 1.391 | 1.507 |       |       |       |       |
| Subf. 17 | 0.406 | 0.511 | 0.349 | 0.375 | 0.418 | 0.426 | 0.297 | 0.586 | 0.313 | 0.327 | 0.398 | 0.292 | 0.431 | 0.336 | 0.140 | 1.365 |       |       |       |
| Subf. 18 | 0.401 | 0.449 | 0.330 | 0.375 | 0.418 | 0.390 | 0.339 | 0.611 | 0.312 | 0.318 | 0.391 | 0.288 | 0.430 | 0.310 | 0.149 | 1.533 | 0.137 |       |       |
| Subf. 19 | 0.376 | 0.505 | 0.334 | 0.351 | 0.371 | 0.390 | 0.266 | 0.598 | 0.285 | 0.287 | 0.337 | 0.301 | 0.465 | 0.309 | 0.119 | 1.375 | 0.157 | 0.160 |       |
| Subf. 20 | 0.366 | 0.460 | 0.330 | 0.356 | 0.309 | 0.432 | 0.233 | 0.496 | 0.238 | 0.285 | 0.367 | 0.247 | 0.651 | 0.280 | 0.145 | 1.509 | 0.138 | 0.123 | 0.113 |

304

305

306

307 As a result, there are clear cases of incongruence between the species and TE's  
308 phylogenies (Figs 1 and 2, respectively), in which Micropia sequences found in the  
309 genomes of distantly related species are clustered in the same subfamily in the Micropia  
310 phylogeny, and copies within a unique genome do not share a unique and exclusive  
311 common ancestor. For example, subfamily 7 (Fig 2) comprises sequences within the  
312 genome of *cardini* and *repleta* group species, belonging to the *Drosophila* and  
313 *Siphlodora* subgenera, respectively, together with sequences encountered within the  
314 genome of *D. willistoni*, which belongs to the *Sophophora* subgenus. As concerns the  
315 presence of divergent copies within the same genome, the cases of *D. buzzatii* (*repleta*  
316 group), *D. americana* (*virilis* group) and *D. willistoni* (*willistoni* group) should be  
317 highlighted, since these species present Micropia sequences widely spread over the tree,  
318 nested in five, six and nine of the subfamilies, respectively.

319 The analysis of potential coding sequences for the 98 sequences of Micropia  
320 presented in the final tree (sequences of [15] were not included in this analysis, as well  
321 as the outgroup Copia sequence) shows that approximately 49% of them (48 from 98)  
322 putatively encode for reverse transcriptase enzyme (S4 Table). In fact, from the total set  
323 of 34 species with Micropia sequences evaluated here, only *D. erecta*, *D. kikkaway*, *D.*  
324 *mojavensis* and *D. polymorpha* do not possess potentially encoding sequences.

325

### 326 **dS estimates and identification of horizontal transposon transfer (HTT) events**

327 The use of *Adh*, *Amd* and *Ddc* nuclear gene sequences held a total of 4,367,  
328 4,370 and 4,558 pairwise dS comparisons, respectively (S5 Table). Micropia dS values  
329 were lower than those found for the host nuclear genes in 277 cases (significance in the  
330 Fisher exact test - with p value < 0.05 - were obtained for 96, 266 and 207 comparisons  
331 involving *Adh*, *Amd* and *Ddc*, respectively), revealing patterns incompatible with

332 vertical transposon transmission (VTT). Thus, signals of HTTs account for 2.2%, 6.1%  
333 and 4.5% of the comparisons performed with *Adh*, *Amd* and *Ddc*, respectively. Fig 2  
334 highlights all species involved in at least one case of significantly lower Micropia dS  
335 value. Indeed, only 19 of 97 sequences of Micropia for which the Fisher Exact Test  
336 could be performed do not present any signal of involvement in HTTs events  
337 (sequences of [15] were not included in this analysis, as well as that from the outgroup  
338 and from *D. zotti*, for which none of the three nuclear genes have been previously  
339 characterized).

340

## 341 **Discussion**

### 342 **Micropia classification**

343 By comparing our data with those of Bargues and Lerat's [15], it is possible to  
344 show that our non-stringent methodology retrieved sequences belonging to Micropia  
345 within the Micropia/Sacco group of the *Ty3/gypsy* retrotransposable elements. Within  
346 this group, Micropia is recovered as a monophyletic lineage that is sister to the Bica  
347 group of LTR retroelements. The Bayesian phylogeny of these sequences highlights the  
348 existence of a high array of divergent sequences, which are compatible with the  
349 subdivision of Micropia in specific groups. Nevertheless, the taxonomic status  
350 represented by these remains a matter of debate.

351 In fact, except for the very well accepted criteria used to classify TEs in classes  
352 and subclasses proposed by [59], in general, there is no consensus over the criteria  
353 adopted to achieve TEs families and subfamilies [60]. Several authors used different  
354 strategies to identify new TE families and subfamilies, whether based on nucleotide  
355 and/or amino acid sequence similarities [30, 61, 62, 63, 64, 65, 66]. Given the  
356 abundance and diversity of TEs, [64] proposed a classification for eukaryotic TEs based

357 uniquely on nucleotide similarities. Nevertheless, given the absence of evolutionary  
358 criteria based on reciprocal monophyly, this system is yet widely controversial. So, we  
359 adopted here more conservative criteria, according to which different subfamilies are  
360 established based on reciprocal monophyly and divergence values higher than 0.3 at the  
361 amino acid level [30].

362         Adopting these criteria, our data shows the existence of at least 20 potential  
363 Micropia subfamilies that form the reciprocally monophyletic groups or monotypic  
364 lineages shown in Fig 2. Several of these subfamilies are spread over distinct  
365 *Drosophila* subgenera and groups, although only subfamilies 7 and 12 could be sampled  
366 across species of *Sophophora*, *Drosophila*, and *Siphlodora*. In this sense, most  
367 sequences within the *Drosophila* subgenus species are clustered in subfamily 7, whereas  
368 sequences of *Siphlodora* are highly intermingled in the topology, but are predominantly  
369 nested in subfamilies 3, 7, 10 and 12. The other Micropia subfamilies are mostly  
370 comprised by sequences within species of the *Sophophora* subgenus, especially by  
371 sequences within the *melanogaster* group. Interestingly, sequences of Micropia used by  
372 [15] are distributed across nine of the 20 subfamilies here established, showing the wide  
373 diversity of Micropia sequences in Drosophilidae species genomes.

374

### 375 **Micropia evolutionary history**

376         In addition to this pattern of high diversity, our data also show that the  
377 evolutionary history of Micropia retroelement in *Drosophila* is characterized by several  
378 VTTs and HTTs events. Although VTTs may comprise the predominant form of  
379 transmission (94-98% of the events), HTTs is clearly an important way these genomic  
380 parasites have to evade genomic extinction [17, 18]. In our data, the evidence for HTT  
381 in Micropia evolution came from three main sources: the patchy distribution within

382 Drosophilidae phylogeny, the incongruence between Micropia and species phylogenies,  
383 and the significantly lower dS values presented by some Micropia sequences in  
384 comparison to nuclear host genes [17, 26]. In the first line of evidence, PCR and Dot-  
385 Blot analyses provided some interesting results, especially when they were evaluated  
386 considering the results obtained through genomic data, aiming to get inferences about  
387 presence/absence patterns along the Drosophilidae phylogeny. Sequence analysis was  
388 further performed using amino acid data to reconstruct the Micropia phylogenetic  
389 relationships and using codon-aligned nucleotide data in order to measure synonymous  
390 distances. This whole set of results enabled to envision a hypothesis about the evolution  
391 of Micropia sequences within Drosophilidae.

392 The *cardini* group species was the best-represented *Drosophila* group in our  
393 analysis, and 80% of its species had their genome analyzed (12 from the 15 described  
394 species; [67]). Of these, eight species presented Micropia sequences. Conversely, the  
395 *melanogaster* and the *repleta* groups, for which several species have sequenced  
396 genomes, presented the higher percentage of species containing Micropia copies on the  
397 genomes here analyzed (100%). The number of isolated sequences is generally higher  
398 for species of the last groups, for which whole genome sequences are frequently  
399 available. Nevertheless, the use of *in vitro* methodologies to investigate the presence of  
400 TEs in non-model group species revealed here an important strategy to establish a  
401 robust evolutionary hypothesis for the element. For example, using such methodologies  
402 we were able to identify the absence of Micropia copies in the genome of several  
403 species belonging to distinct groups (*funnebris*, *guaramunu*, *guarani*, *immigrans* and  
404 *tripunctata*), confirming, therefore, the patchy distribution of Micropia in the  
405 *Drosophila* subgenus.

406           The *cardini* group species showed an interesting Micropia distribution pattern.  
407   Micropia sequences are present only in the genome of species occurring in the  
408   mainland, from south North America to southern South America [68]. The other four  
409   species, *D. arawakana*, *D. durni*, *D. nigrodurni* and *D. similis*, which seem to be  
410   devoid of Micropia (S1 Fig), are endemic to the Caribbean islands [68]. The clustering  
411   of the Micropia sequences presented by the mainland *cardini* species and their  
412   straightforward similarity in amino acid sequences suggest the element has invaded the  
413   genome of these species around 1.5Mya, which is quite earlier than the divergence  
414   times estimated for the target species (4 - 35 Mya, as estimated by [51]). Considering  
415   this, it is interesting to note that 73% (8 of 11) of the Micropia RT sequences analyzed  
416   for the *cardini* group species seem to be potentially capable to code for reverse  
417   transcriptase enzyme, which is also an evidence in favour of a recent invasion. This  
418   invasion apparently occurred through multiple HTTs, as can be inferred through the  
419   comparison of pairwise Micropia dS values and orthologous nuclear genes dS values.  
420   This methodology is able to detect HTTs between closely-related species [29]. In fact,  
421   all the 51 comparisons involving only species of the *cardini* group showed significantly  
422   lower dS values for Micropia than for any of the three evaluated nuclear genes.  
423   Nevertheless, although several HTTs events seem to have occurred between species of  
424   the *cardini* group, it is quite probable that the ancestor sequence of this group came  
425   from a species belonging to the *repleta* group (or another related group not analyzed  
426   here), for which at least some sequences of subfamily 7 seem to have evolved through  
427   VTTs. This can be seen, for example, by the absence of rejection of the null hypothesis  
428   of VTT in the comparison of dS values between the sequences Dhydei\_X13304 and  
429   Dbuzzatti\_04\_2 and those of the host nuclear genes. This pattern is also corroborated by  
430   [39].

431 Several other HTTs might also have occurred within the *melanogaster* group  
432 (53.3% of potentially coding sequences) and evidence for these can be found within  
433 subfamilies 1, 4, 10, 11 and 14. In subfamily 10, for example, the Micropia copies in *D.*  
434 *melanogaster*, *D. simulans* and *D. sechellia* genomes are identical, suggesting recent  
435 events of HTTs. Conversely, in subfamily 1, there are clear incongruences between  
436 Micropia and species phylogeny, and a sequence encountered in *D. suzukii* may have  
437 been recently transferred to *D. rhopaloa*, given the earlier branching of the Micropia  
438 sequences from *D. suzukii* genome, and this event occurred around 5 Mya. In fact, these  
439 species are included in different subgroups of the *melanogaster* group, for which  
440 divergence times at the same divergence level are older than 10Mya [46].

441 Interestingly, signals of HTTs are less straightforward among species of the  
442 *repleta* group, and despite the presence of sequences nested in different Micropia  
443 subfamilies, only subfamily 7 presents some evidence of HTT involving *D. hydei*, *D.*  
444 *buzzatii* and *D. mercatorum*. Such events were dated to approximately 1.25 Mya, which  
445 is quite more recent than the divergence times estimated for these species (4-16 Mya –  
446 51]). Interestingly, there are two common features between these events and those  
447 presented above for the *cardini* group: also here multiple HTTs can be inferred, and  
448 these lie in the same time confidence interval as those discussed above. Moreover, all  
449 the evaluated species of both, the *cardini* and the *repleta* groups occur in the Neotropics  
450 [67], which faced severe climatic oscillations during this period [69]. Since it was  
451 already shown that these events possibly changed the distribution of several species of  
452 *Drosophila* [70. 71], they may have led to several secondary contacts which created the  
453 necessary conditions for HTT.

454 All the HTTs discussed so far occurred between closely related species,  
455 comprising the same species group. According to [16], it is expected that the more

456 species sampled within a group, the more HTT events will be discovered, since  
457 retrotransposons show low HTT rates between distantly related lineages. Nevertheless,  
458 considering the dS comparisons performed within each of the Micropia subfamilies, in  
459 association to the incongruences between species and Micropia phylogenies, we were  
460 also able to hypothesize the occurrence at least seven other HTTs involving species  
461 from distinct *Drosophila* groups or even distinct subgenera, as follow:

462 - Subfamily 3: since this subfamily is widely spread in the genome of species from the  
463 subgenus *Siphlodora*, there must have occurred one HTT from one species of the  
464 *Siphlodora* subgenus to *D. suzukii*, the only species of the *melanogaster* group with  
465 sequences belonging to this Micropia subfamily;

466 - Subfamily 7: the sequences Dhydei\_X13304 and X13305 do not present signals of  
467 HTT with Dbuzzatti\_04\_2, so these sequences might be the presumably ancestral copies  
468 within this subfamily. In this way, besides the HTTs within the *cardini* and *repleta*  
469 groups discussed above, and that from one species of the *repleta* group (possibly *D.*  
470 *hydei*) to another species of the *cardini* group, there might have occurred at least one  
471 HTT from *D. buzzatii* to *D. willistoni*.

472 - Subfamily 11: as Damericana\_121 does not show signals of HTT comparing with  
473 Dbusckii\_03, they might represent ancestral sequences. In this way, it might have  
474 occurred at least one HTT to species of the *melanogaster* group.

475 - Subfamily 12: given the absence of HTTs signals among several species of the  
476 *melanogaster* group, as well as among species of the *Siphlodora* subgenus, most of  
477 these copies possibly evolved through VTT since the most recent common ancestor  
478 (MRCA) of both lineages. Nevertheless, there is evidence of one HTT presumably from  
479 *D. sechellia* to *D. willistoni*, one from *D. ananassae* to *D. albomicans*, and one  
480 involving the MRCA of the *melanogaster* and *Siphlodora* lineages.



481 - Subfamily 14: this Micropia subfamily is widespread in the *melanogaster* group, from  
482 which a HTT presumably occurred to *D. americana*.

483 In conclusion, the Micropia evolutionary history is based on VTTs and HTTs  
484 events with a high diversification of sequences leading to the distinct subfamilies here  
485 detected, with some sequences still capable to encode RT enzyme. Moreover, species  
486 from the *repleta* and *melanogaster* group seem to have played an important role in most  
487 HTT events inferred here within *Drosophila*. The wide distribution range occupied by  
488 some species of these groups possibly contributed to these phenomena, by providing  
489 more chances to HTT due to the overlapped distribution with other species [16].

490

## 491 **Acknowledgements**

492 We thank Dr. Emmanuele Lerat for kindly provide the sequences belonging to  
493 Micropia/Sacco group of Ty3/Gypsy retroelements; Christopher McAllester for  
494 suggestions on early version of the manuscript; and all researchers from the Laboratório  
495 de Drosophilidae at UFRGS. This study was funded by the Brazilian institutions  
496 FAPERGS, CNPq and CAPES.

497

## 498 **References**

- 499 1. Pardue M-L, DeBaryshe PG. Retrotransposons that maintain chromosome ends.  
500 Proceedings of the National Academy of Science. 2011; 108:20317–24.
- 501 2. Jangam D, Feschotte C, Betran E. Transposable element domestication as an  
502 adaptation to evolutionary conflicts. Trends in Genetics. 2017; 33:817-831
- 503 3. Joly-Lopez Z, Bureau TE. Exaptation of transposable element coding sequences.  
504 Current Opinion in Genetics & Development. 2018; 49:34–42.

- 505 4. Bourque G, Burns KH, Gehring M, Gorbunova V, Seluanov A, Hammell M, et al.  
506 Ten things you should know about transposable elements. *Genome Biology*. 2018;  
507 19(1), 199.
- 508 5. Volff JN. Turning junk into gold: domestication of transposable elements and the  
509 creation of new genes in eukaryotes. *Bioessays*. 2006; 28(9), 913-922.
- 510 6. Sinzelle L, Izsvak Z, Ivics Z. Molecular domestication of transposable elements:  
511 from detrimental parasites to useful host genes. *Cellular and Molecular Life*  
512 *Sciences*. 2009; 66(6), 1073-1093.
- 513 7. Feschotte C. Transposable elements and the evolution of regulatory networks. *Nature*  
514 *Reviews Genetics*. 2008; 9(5), 397.
- 515 8. Lee HE, Ayarpadikannan S, Kim HS. Role of transposable elements in genomic  
516 rearrangement, evolution, gene regulation and epigenetics in primates. *Genes &*  
517 *Genetic Systems*. 2016; 15-00016.
- 518 9. Loreto ELS, Deprá M, Diesel JF, Panzera Y, Valente VLS. *Drosophila* relics hobo  
519 and hobo-MITEs transposons as raw material for new regulatory  
520 networks. *Genetics and Molecular Biology*. 2018; 41(1), 198-205.
- 521 10. Muotri AR, Marchetto MC, Coufal NG, Gage FH. The necessary junk: new  
522 functions for transposable elements. *Human Molecular Genetics*. 2007; 16(R2),  
523 R159-R167.
- 524 11. Tsushima A, Gan P, Kumakura N, Narusaka M, Takano Y, Narusaka Y, Shirasu K.  
525 Genomic plasticity mediated by transposable elements in the plant pathogenic  
526 fungus *Colletotrichum higginsianum*. *Genome Biology and Evolution*. 2019; 11(5):  
527 1487-1500
- 528 12. Kidwell MG. Transposable elements and the evolution of genome size in  
529 eukaryotes. *Genetica*. 2002; 115(1), 49-63.

- 530 13. Lander ES, Linton LM, Birren B, Nusbaum C, Zody MC, Baldwin J, et al. Initial  
531 sequencing and analysis of the human genome. *Nature*. 2001; 409, 860–921
- 532 14. Schnable PS et al. The B73 maize genome: complexity, diversity, and dynamics.  
533 *Science*. 2009; 326, 1112–1115
- 534 15. BARGUES N, LERAT E. Evolutionary history of LTR retrotransposons among 20  
535 *Drosophila* species Mobile DNA. 2017; 8:7.
- 536 16. Peccoud J, Loiseau V, Cordaux R, Gilbert C. Massive horizontal transfer of  
537 transposable elements in insects. *Proceedings of the National Academy of*  
538 *Sciences*. 2017; 114(18), 4721-4726.
- 539 17. Schaack S, Gilbert C, Feschotte C. Promiscuous DNA: horizontal transfer of  
540 transposable elements and why it matters for eukaryotic evolution. *Trends in*  
541 *Ecology & Evolution*. 2010; 25(9), 537-546
- 542 18. Gilbert C, Feschotte C. Horizontal acquisition of transposable elements and viral  
543 sequences: patterns and consequences. *Current Opinion in Genetics &*  
544 *Development*. 2018; 49:15–24
- 545 19. Maumus F, Fiston-Lavier A-S, Quesneville H. Impact of transposable elements on  
546 insect genomes and biology. *Current Opinion in Insect Science*. 2015; 7, 1-7.
- 547 20. McDonald JF. Evolution and consequences of transposable elements. *Current*  
548 *Opinion in Genetics and Development*. 1993; 3: 855-864.
- 549 21. Capy P, Gasperi G, Biémont C, Bazin C. Stress and transposable elements: co-  
550 evolution or useful parasites? *Heredity*. 2000; 85, 101–106.
- 551 22. Chuong EB, Elde NC, Feschotte C. Regulatory activities of transposable elements:  
552 from conflicts to benefits. *Nature Reviews Genetics*. 2017; 18, 71–86

- 553 23. El Baidouri M, Carpentier M-C, Cooke R, Gao D, Lasserre E, Llauro C, Mirouse M,  
554 Picault N, Jackson SA, Panaud O. Widespread and frequent horizontal transfers of  
555 transposable elements in plants. *Genome Res.* 2014; 24:831–838
- 556 24. Ivancevic AM, Walsh AM, Kortschak RD, Adelson DL. Jumping the fine LINE  
557 between species: Horizontal transfer of transposable elements in animals catalyses  
558 genome evolution. *BioEssays.* 2013; 35:1071–1082
- 559 25. Wallau GL, Capy P, Loreto E, Le Rouzic A, Hua-Van A. VHICA, a new method to  
560 discriminate between vertical and horizontal transposon transfer: Application to the  
561 mariner family within *Drosophila*. *Mol Biol Evol.* 2016; 33:1094–1109.
- 562 26. Loreto ELS, Carareto CM, Capy P. Revisiting horizontal transfer of transposable  
563 elements in *Drosophila*. *Heredity.* 2008; 100, 545–554
- 564 27. Silva JC et al. Factors that affect the horizontal transfer of transposable elements.  
565 *Curr. Issues Mol. Biol.* 2004; 6, 57–71
- 566 28. Wallau GL, Ortiz MF, Loreto ELS. Horizontal transposon transfer in eukarya:  
567 detection, bias, and perspectives. *Genome Biology and Evolution.* 2012; 4(8), 801-  
568 811.
- 569 29. Bartolomé C, Bello X, Maside X. Widespread evidence for horizontal transfer of  
570 transposable elements across *Drosophila* genomes. *Genome Biol.* 2009; 10:R22
- 571 30. Capy P, Bazin C, Higuier D, Langin T. 1<sup>st</sup> ed. *Dynamic and Evolution of*  
572 *Transposable Elements.* RG Landes Company, Austin. 1997.
- 573 31. Kim A, Terzian C, Santamaria P, Péliesson A, Purd'homme N, Bucheton A.  
574 Retroviruses in invertebrates: the Gypsy retrotransposon is apparently an infectious  
575 retrovirus of *Drosophila melanogaster*. *Proc Natl Acad Sci.* 1994; 91:1285–9.

- 576 32. Song SU, Gerasimova T, Kurkulos M, Boeke JD, Corces VG. An env-like protein  
577 encoded by a *Drosophila* retroelement: evidence that Gypsy is an infectious  
578 retrovirus. *Genes Dev.* 1994; 8:2046–57
- 579 33. Huijser P, Kirchhoff C, Lankenau D-H, Hennig W. Retrotransposon-like sequences  
580 are expressed in Y chromosomal lampbrush loops of *Drosophila hydei*. *J Mol Biol.*  
581 1988; 203:689–697
- 582 34. Lankenau D-H, Huijser P, Jansen E, Miedema K, Hennig W. Micropia: a  
583 retrotransposon of *Drosophila* combining structural features of DNA viruses,  
584 retroviruses and non-viral transposable elements. *J Mol Biol.* 1988; 2:233–246
- 585 35. Lankenau D-H, Huijser P, Jansen E, Miedema K, Hennig W. DNA sequence  
586 comparison of Micropia transposable elements from *Drosophila hydei* and  
587 *Drosophila melanogaster*. *Chromosoma.* 1990; 99:111–117
- 588 36. Almeida LM, Castro JP, Carareto CMA. Micropia transposable element occurrence  
589 in *Drosophila* species of the *saltans* group. *DIS.* 2001; 84:114–117
- 590 37. Almeida LM, Carareto CMA. Identification of two subfamilies of Micropia  
591 transposable element in species of the *repleta* group of *Drosophila*. *Genetica.* 2004;  
592 121:155–164
- 593 38. Almeida LM, Carareto CMA. Sequence heterogeneity and phylogenetic  
594 relationships between the Copia retrotransposon in *Drosophila* species of the  
595 *repleta* and *melanogaster* groups. *Genet Sel Evol.* 2006; 38:535–550
- 596 39. Cordeiro J, Robe LJ, Loreto EL, Valente VL. The LTR retrotransposon Micropia in  
597 the *cardini* group of *Drosophila* (Diptera: Drosophilidae): a possible case of  
598 horizontal transfer. *Genetica.* 2008; 134(3): 335--344.

- 599 40. Setta N, Van-Sluys MA, Capy P, Carareto CM. Multiple invasions of Gypsy  
600 and Micropia retroelements in genus *Zaprionus* and *melanogaster* subgroup of the  
601 genus *Drosophila*. BMC Evolutionary Biology. 2009; 9(1), 279.
- 602 41. Lankenau D-H. The retrotransposon family Micropia in *Drosophila* species. In:  
603 McDonald J (eds) Transposable elements and evolution. 1993. Kluwer Publishers,  
604 Amsterdam pp 232–241
- 605 42. Lankenau S, Corces GV, Lankenau D-H. The *Drosophila* Micropia retrotransposon  
606 encodes a testis-specific antisense RNA complementary to reverse transcriptase.  
607 Mol Biol Evol. 1994. 17:1542–1557
- 608 43. Yassin, A. Phylogenetic classification of the Drosophilidae Rondani (Diptera): the  
609 role of morphology in the postgenomic era. Sys. Entomol. 2013; 38: 349–364.
- 610 44. Sassi AK, Herédia FO, Loreto ELS, Valente VLS, Rohde C. Transposable elements  
611 P and gypsy in natural populations of *Drosophila willistoni*. Genet Mol Biol. 2005;  
612 28:734–739
- 613 45. Staden R. The Staden sequence analysis package. Mol. Biotechnol. 1996; 5:233–  
614 241
- 615 46. Tamura K, Stecher G, Peterson D, Filipski A, Kumar S. MEGA6: Molecular  
616 Evolutionary Genetics Analysis Version 6.0. Molecular Biology and Evolution.  
617 2013; 30: 2725-2729.
- 618 47. Edgar RC. MUSCLE: multiple sequence alignment with high accuracy and high  
619 throughput, Nucleic Acids Research. 2004; 32(5), 1792-1797.
- 620 48. Miller MA, Pfeiffer W, Schwartz T. (2010) Creating the CIPRES Science Gateway  
621 for inference of large phylogenetic trees. Proceedings of the Gateway Computing  
622 Environments Workshop (GCE), 14 Nov. 2010, New Orleans, LA pp 1 – 8.

- 623 49. Brisson JA, Wilder J, Hollocher H. Phylogenetic analysis of the *cardini* group of  
624 *Drosophila* with respect to changes in pigmentation. *Evolution*. 2006; 60:1228–  
625 1241
- 626 50. Gao J, Watabe H, Aotsuka T, Pang J, Zang Y. Molecular phylogeny of the  
627 *Drosophila obscura* species group, with emphasis on the Old World species *BMC*  
628 *Evolutionary Biology*. 2007, 7:87
- 629 51. Robe LJ, Loreto EL, Valente VL. Radiation of the *Drosophila* subgenus  
630 (*Drosophilidae*, *Diptera*) in the Neotropics. *Journal of Zoological Systematics and*  
631 *Evolutionary Research*. 2010; 48(4), 310-321.
- 632 52. Robe LJ, Valente VL, Loreto EL. Phylogenetic relationships and macro-evolutionary  
633 patterns within the *Drosophila tripunctata* “radiation” (*Diptera*: *Drosophilidae*).  
634 *Genetica*. 2010; 138(7), 725-735.
- 635 53. Yang Y, Hou Z-C, Qian Y-H, Kang H, Zeng Q-T. Increasing the data size to  
636 accurately reconstruct the phylogenetic relationships between nine subgroups of the  
637 *Drosophila melanogaster* species group (*Drosophilidae*, *Diptera*). *Molecular*  
638 *Phylogenetics and Evolution*. 2012; 62: 214-223
- 639 54. Seetharam AS, Stuart GW. Whole genome phylogeny for 21 *Drosophila* species  
640 using predicted 2b-RAD fragments. *PeerJ*. 2013; 1:e226
- 641 55. O’Grady PM, DeSalle R. Phylogeny of the genus *Drosophila*. *Genetics*. 2018;  
642 209(1), 1-25.
- 643 56. Nei M, Gojobori T. Simple methods for estimating the numbers of synonymous and  
644 nonsynonymous nucleotide substitutions. *Mol Biol Evol*. 1986; 3:418–426
- 645 57. R Core Team. *R: A Language and Environment for Statistical Computing*. 2018.
- 646 58. Sharp PM, Li WH. On the rate of DNA sequence evolution in *Drosophila*. *Journal*  
647 *of Molecular Evolution*. 1989; 28(5), 398-402.

- 648 59. Finnegan DJ. Eukaryotic transposable elements and genome evolution. Trends  
649 Genet. 1989; 5, 103–107.
- 650 60. Piégu B, Bire S, Arensburger P, Bigot Y. A survey of transposable element  
651 classification systems—a call for a fundamental update to meet the challenge of their  
652 diversity and complexity. Molecular Phylogenetics and Evolution. 2015; 86, 90-  
653 109.
- 654 61. Lohe AR, Moriyama EN, Lidholm DA, Hartl DL. Horizontal transmission, vertical  
655 inactivation, and stochastic loss of mariner-like transposable elements. Molecular  
656 Biology and Evolution. 1995; 12(1), 62-72.
- 657 62. Clark JB, Kidwell MG. A phylogenetic perspective on P transposable element  
658 evolution in *Drosophila*. Proc. Natl. Acad. Sci. U.S.A. 1997; 94(21): 11428-11433.
- 659 63. Herédia FO, Loreto ELS, Valente VLS. Complex evolution of gypsy in drosophilid  
660 species. Mol Biol Evol. 2004; 21:1–12
- 661 64. Wicker T, Sabot F, Hua-Van A, Bennetzen JL, Capy P, Chalhoub B, et al. A unified  
662 classification system for eukaryotic transposable elements. Nature Reviews  
663 Genetics. 2007; 8(12), 973.
- 664 65. Bao W, Kojima KK, Kohany O. Repbase Update, a database of repetitive elements  
665 in eukaryotic genomes. Mobile DNA. 2015; 6: 11
- 666 66. Arkhipova IR. Using bioinformatic and phylogenetic approaches to classify  
667 transposable elements and understand their complex evolutionary histories. Mobile  
668 DNA. 2017; 8(1), 19.
- 669 67. Bächli G. Taxodros database: The database on taxonomy of Drosophilidae. URL:  
670 <http://www.taxodros.unizh.ch/>. Last accessed in April 2019



- 671 68. Heed WB, Russel JS. Phylogeny and population structure in island and continental  
672 species of the cardini group of *Drosophila* studied by inversion analysis. Univ  
673 Texas Publs. 1971; 7103:91–130
- 674 69. Souza CRG. Quaternário do Brasil. 1st ed. Holos Editora. 2005.
- 675 70. Franco FF, Manfrin MH. Recent demographic history of cactophilic *Drosophila*  
676 species can be related to Quaternary palaeoclimatic changes in South  
677 America. *Journal of Biogeography*. 2013; 40(1), 142-154.
- 678 71. Cenzi de Ré F, Gustani EC, Oliveira APF, Machado LP, Mateus RP, Loreto ELS,  
679 & Robe LJ. Brazilian populations of *Drosophila maculifrons* (Diptera:  
680 Drosophilidae): low diversity levels and signals of a population expansion after the  
681 Last Glacial Maximum. *Biological Journal of the Linnean Society*. 2014. 112(1),  
682 55-66.
- 683

## Supporting information

**S1 Fig. In vitro searches for Micropia within genomes.** A: PCR-blot results of species from the *cardini* and *repleta* groups. B: Dot-blot on genomic DNA confirming the pattern seen on the PCR-blot. In both cases, the probe used was an 812bp PCR fragment from *D. hydei* dhMiF2 sequence. Control: 5µl (in 10 µl) of Micropia probe.

**S2 Fig. Bayesian phylogenetic tree of all Micropia sequences recovered by our searches within the Drosophilidae species analyzed in this study.** The phylogenetic tree was based on amino acid sequences following a mixed evolution model with gamma correction. Bargues and Lerats's sequences [15] were included in the analysis. The posterior probability of each clade is indicated beside its respective internal branch.

**S1 Table. GenBank accession numbers of nuclear genes used in the dS analysis.** - : data not available.

**S2 Table. Micropia retroelement related sequences retrieved through *in silico* searches.** Species scaffold: represents the scaffold in the species genome where Micropia sequence was found. First nt: first nucleotide in the scaffold where Micropia RT sequence homologous to our query was detected. Last nt: last nucleotide in the scaffold where Micropia RT sequence homologous to our query was detected. Methodology: database and *in silico* search methodology used to find the Micropia best match query.

**S3 Table. Amino acid genetic distances between sequences belonging to the same *Micropia* subfamily.** Data for each subfamily are in distinct sheet in the Excel file.

**S4 Table. Potentially coding sequences and their respective coding frame.** Sequences presenting stop codons are represented by a dash (-). The involvement in HTT was identified by the Fisher exact test (see Table S5)

**S5 Table. Parwise comparative analysis of dS values between *Micropia* and *Adh*, *Amd* and *Ddc* nuclear gene sequences.** Comparisons suggesting horizontal transposon transfer events were statistically tested by one-sided tail Fisher's exact test (Ost). Colors represent the p values lower than 0.05 (see Fig 2) to: Ost<sub>Micropia-Adh</sub> (orange), Ost<sub>Micropia-Amd</sub> (pink) and Ost<sub>Micropia-Ddc</sub> (purple).

bioRxiv preprint doi: <https://doi.org/10.1101/710863>; this version posted July 22, 2019. The copyright holder for this preprint (which was not certified by peer review) is the author/funder, who has granted bioRxiv a license to display the preprint in perpetuity. It is made available under aCC-BY 4.0 International license.

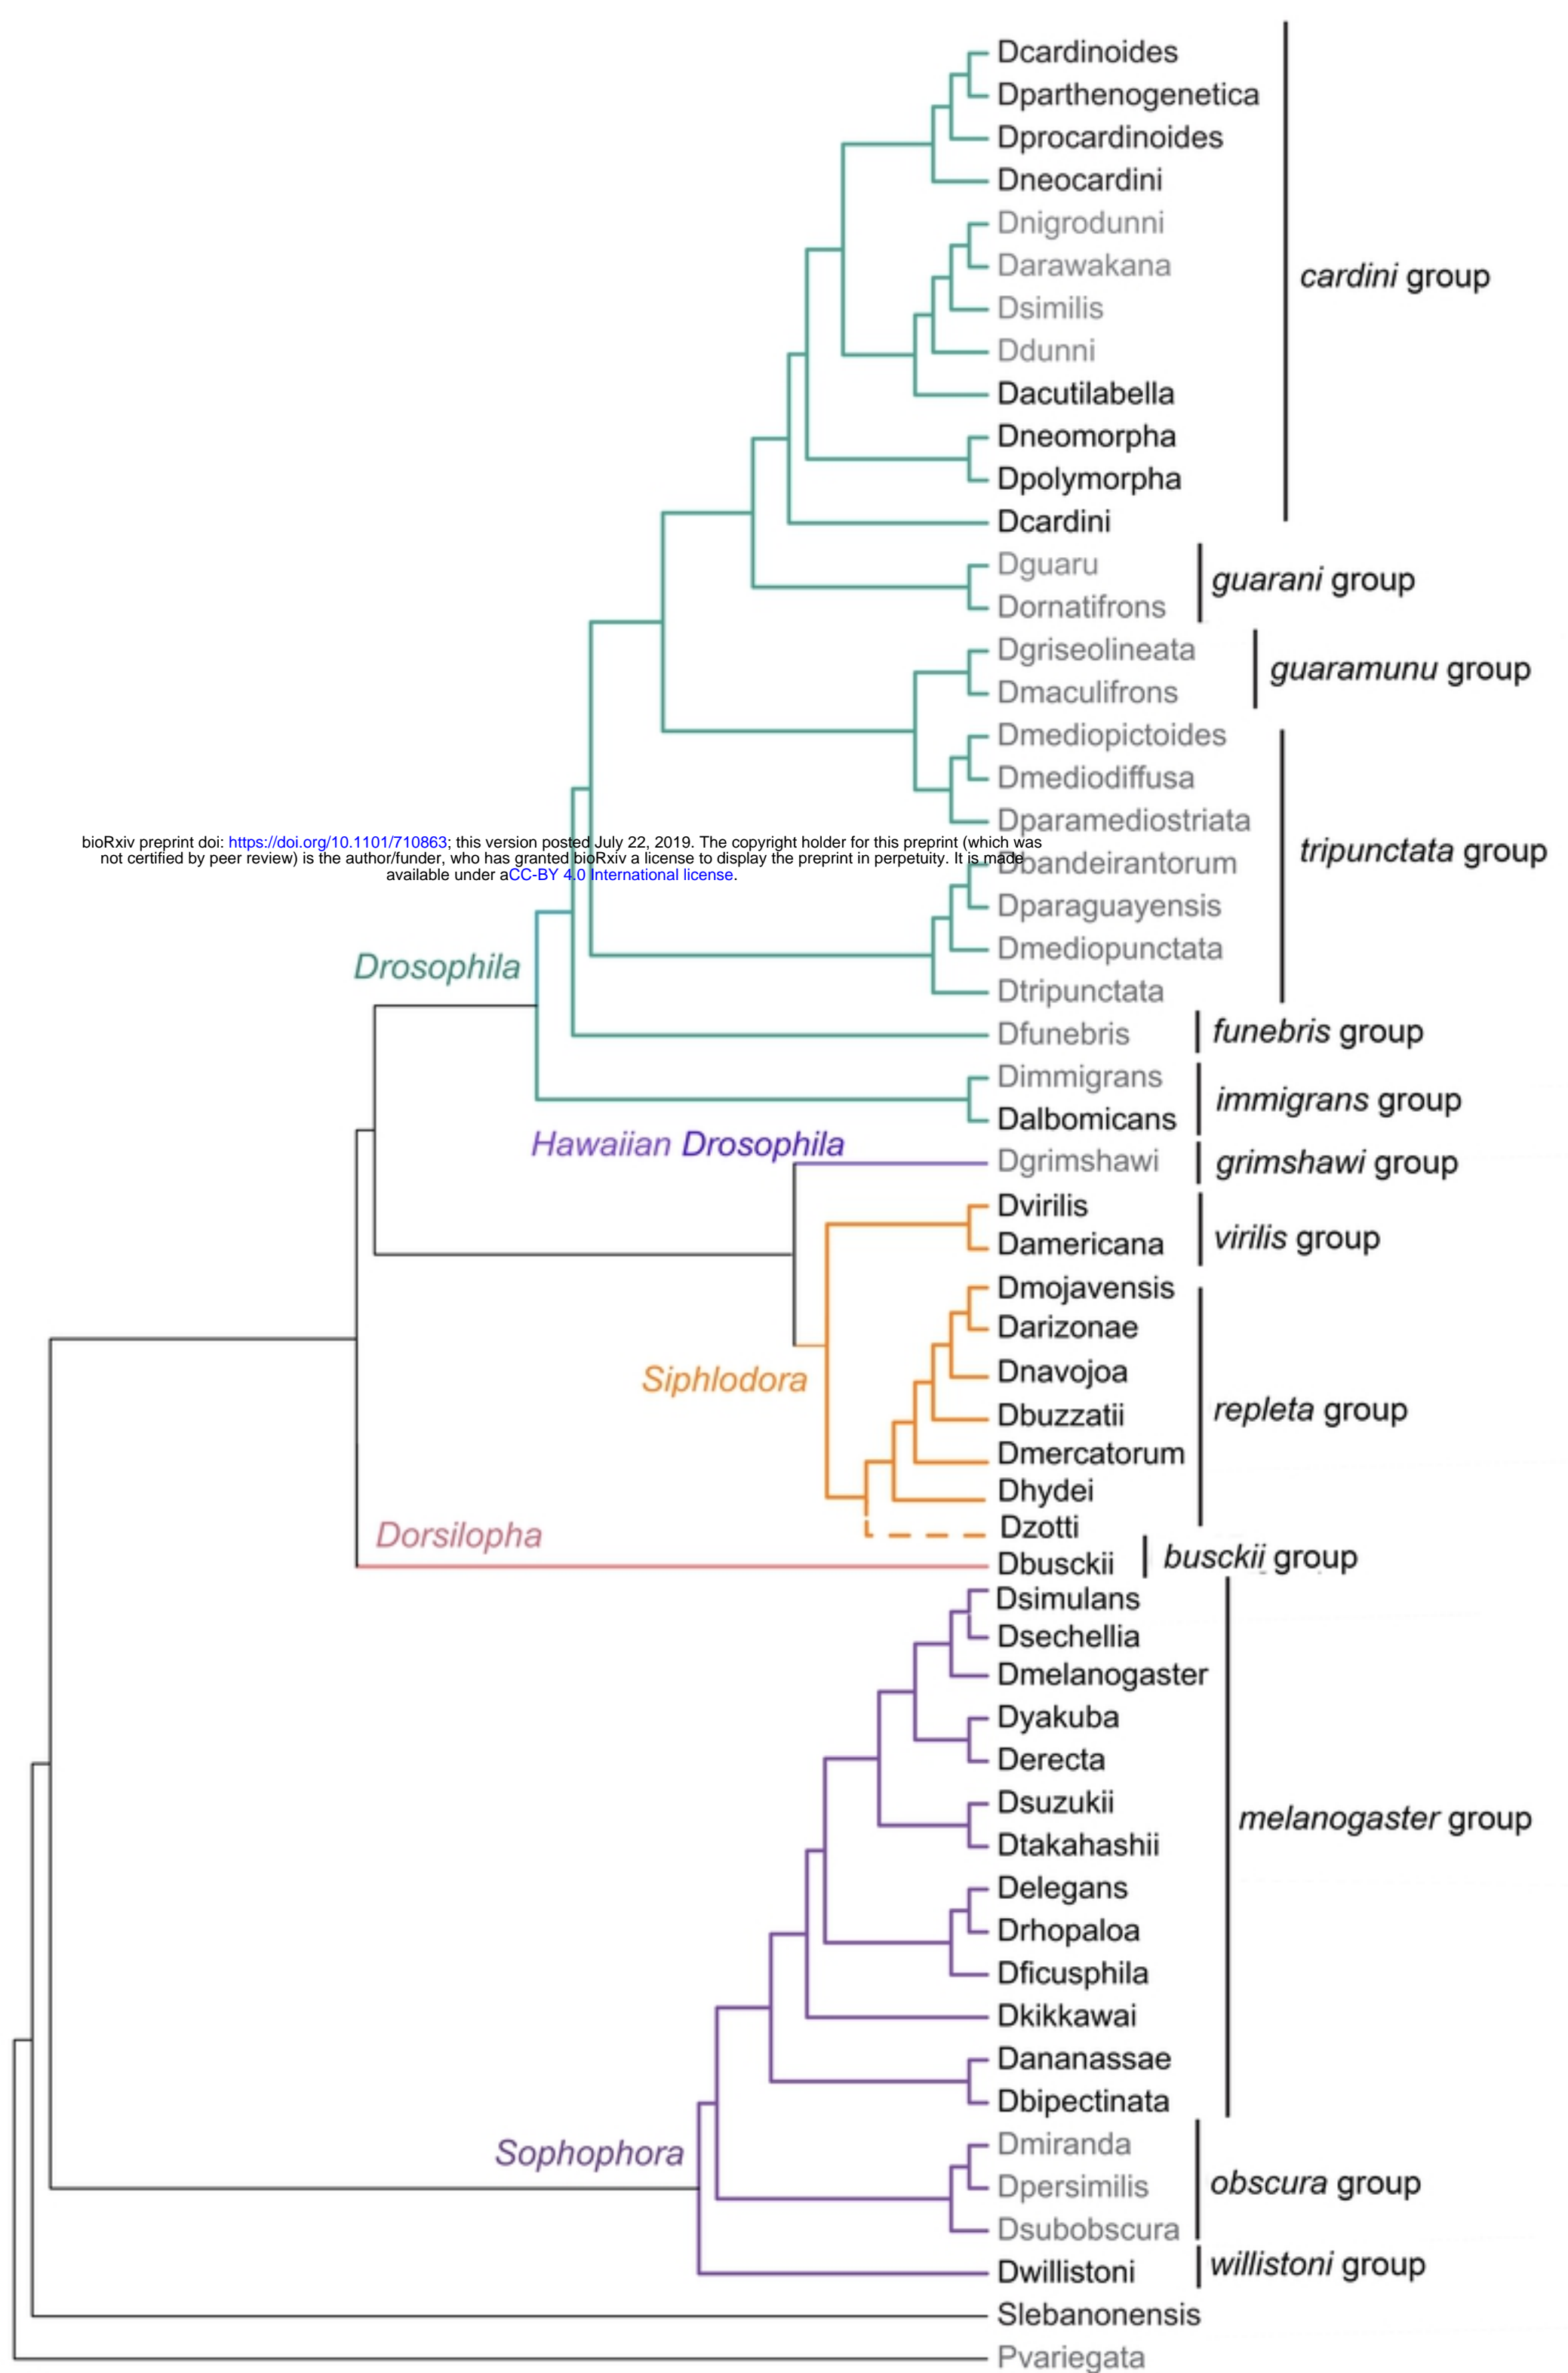

Fig 1

bioRxiv preprint doi: <https://doi.org/10.1101/710863>; this version posted July 22, 2019. The copyright holder for this preprint (which was not certified by peer review) is the author/funder, who has granted bioRxiv a license to display the preprint in perpetuity. It is made available under aCC-BY 4.0 International license.

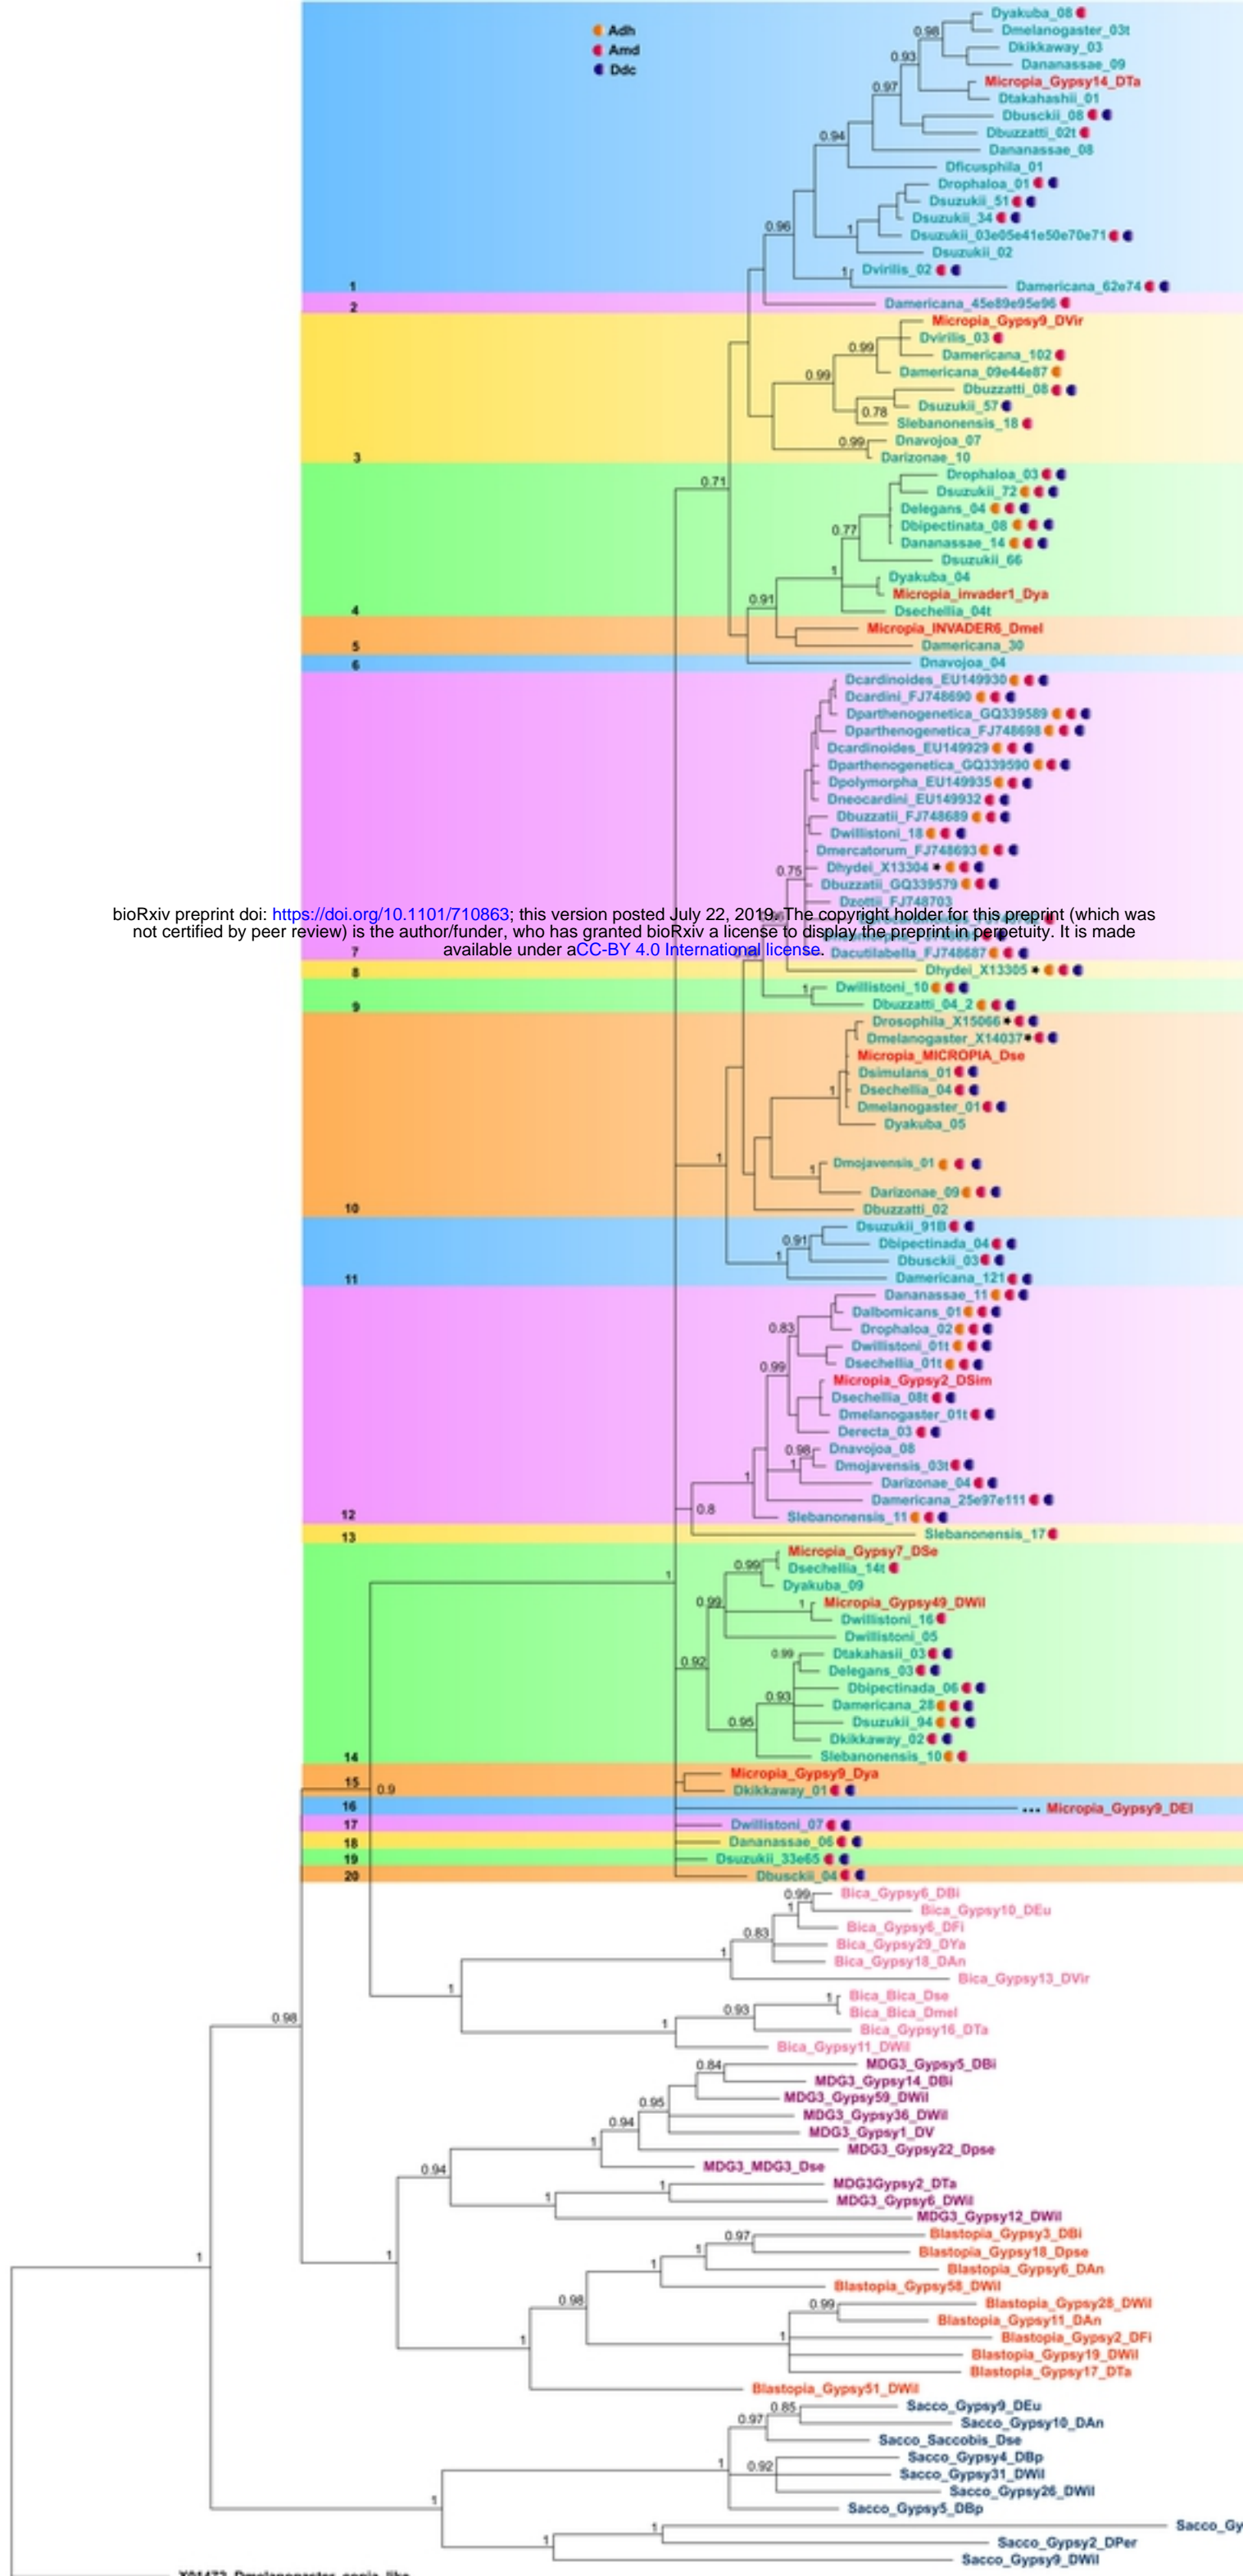

Fig 2
